# Supplementary material
Source: publisher figshare collection journal article supplement (https://tandf.figshare.com/ndownloader/files/17829182)
Supplement: Supplementary file 1 [file 17829182]

## Sheet: Table S2
	Table S2. The 103 circRNA-miRNA-mRNA interaction groups expolred from differentially changed circRNAs, miRNAs and mRNA during rat liver regeneration
	circRNA	2	6	12	24	30	36	72	120	168h	miRNA	2	6	12	24	30	36	72	120	168h	mRNA	2	6	12	24	30	36	72	120	168h
	circ_11301									3	rno-miR-1247-3p	3.01108	3.55744	3.60611	3.3747	1.6713	0.887	0.882541	3.74669	1.60956	Hp1bp3	0.6478	0.622784	0.635946	0.368245	0.49336	0.386014	0.238003	0.285816	0.389441
	circ_03651									0.1	rno-miR-1247-5p	1.12075	3.01815	4.51188	2.62964	3.51669	2.71147	3.15789	3.67022	4.22508	Clmn	0.832511	0.383175	0.772419	0.25653	0.624695	0.4277	0.226025	0.23843	0.505884
	circ_03653	0.1	0.1			0.209913				0.1	rno-miR-1247-5p	1.12075	3.01815	4.51188	2.62964	3.51669	2.71147	3.15789	3.67022	4.22508	Clmn	0.832511	0.383175	0.772419	0.25653	0.624695	0.4277	0.226025	0.23843	0.505884
	circ_06807		3								rno-miR-1247-5p	1.12075	3.01815	4.51188	2.62964	3.51669	2.71147	3.15789	3.67022	4.22508	Clmn	0.832511	0.383175	0.772419	0.25653	0.624695	0.4277	0.226025	0.23843	0.505884
	circ_07541					0.1					rno-miR-1247-5p	1.12075	3.01815	4.51188	2.62964	3.51669	2.71147	3.15789	3.67022	4.22508	Clmn	0.832511	0.383175	0.772419	0.25653	0.624695	0.4277	0.226025	0.23843	0.505884
	circ_20257					3					rno-miR-1247-5p	1.12075	3.01815	4.51188	2.62964	3.51669	2.71147	3.15789	3.67022	4.22508	Clmn	0.832511	0.383175	0.772419	0.25653	0.624695	0.4277	0.226025	0.23843	0.505884
	circ_17904				3						rno-miR-128-1-5p	10.5711	0.064415	0.747608	13.0417	1.25347	6.33571	9.86841	0.358875	0.150546	Rela	0.80371	1.35741	2.13601	0.188578	0.81415	0.405882	0.28296	0.489646	0.361677
	circ_04500							0.1			rno-miR-145-5p	2.08014	2.50786	3.01396	2.37792	3.02891	1.5233	1.97133	3.16449	2.76969	Ppp3ca	0.849695	0.641404	1.24869	0.533115	0.610084	0.229084	0.27099	0.55749	0.511415
	circ_13559								0.193159		rno-miR-145-5p	2.08014	2.50786	3.01396	2.37792	3.02891	1.5233	1.97133	3.16449	2.76969	Ppp3ca	0.849695	0.641404	1.24869	0.533115	0.610084	0.229084	0.27099	0.55749	0.511415
	circ_13710	0.0901857		0.1		0.1		0.1			rno-miR-145-5p	2.08014	2.50786	3.01396	2.37792	3.02891	1.5233	1.97133	3.16449	2.76969	Ppp3ca	0.849695	0.641404	1.24869	0.533115	0.610084	0.229084	0.27099	0.55749	0.511415
	circ_13711									0.1	rno-miR-145-5p	2.08014	2.50786	3.01396	2.37792	3.02891	1.5233	1.97133	3.16449	2.76969	Ppp3ca	0.849695	0.641404	1.24869	0.533115	0.610084	0.229084	0.27099	0.55749	0.511415
	circ_01200	3									rno-miR-214-3p	2.15408	3.1032	2.70755	1.60206	4.89009	2.37589	5.63197	4.08277	6.29621	Cetn2	0.741723	0.457083	0.232146	0.489106	0.567337	0.858525	1.0016	1.42625	1.07349
	circ_04209		0.184397								rno-miR-3065-3p	4.34291	0.051532	8.97129	1.73556	0.668518	1	0.0986454	1	12.4734	Ccna2	0.589252	0.731632	0.93639	13.3491	11.3985	13.7664	5.2753	2.52778	0.46529
	circ_06205	3									rno-miR-3065-3p	4.34291	0.051532	8.97129	1.73556	0.668518	1	0.0986454	1	12.4734	Ccna2	0.589252	0.731632	0.93639	13.3491	11.3985	13.7664	5.2753	2.52778	0.46529
	circ_06207						3				rno-miR-3065-3p	4.34291	0.051532	8.97129	1.73556	0.668518	1	0.0986454	1	12.4734	Ccna2	0.589252	0.731632	0.93639	13.3491	11.3985	13.7664	5.2753	2.52778	0.46529
	circ_11274									0.1	rno-miR-3065-3p	4.34291	0.051532	8.97129	1.73556	0.668518	1	0.0986454	1	12.4734	Ccna2	0.589252	0.731632	0.93639	13.3491	11.3985	13.7664	5.2753	2.52778	0.46529
	circ_17669		3.29167								rno-miR-3065-3p	4.34291	0.051532	8.97129	1.73556	0.668518	1	0.0986454	1	12.4734	Ccna2	0.589252	0.731632	0.93639	13.3491	11.3985	13.7664	5.2753	2.52778	0.46529
	circ_20423									0.1	rno-miR-3065-3p	4.34291	0.051532	8.97129	1.73556	0.668518	1	0.0986454	1	12.4734	Ccna2	0.589252	0.731632	0.93639	13.3491	11.3985	13.7664	5.2753	2.52778	0.46529
	circ_04209		0.184397								rno-miR-3065-3p	4.34291	0.051532	8.97129	1.73556	0.668518	1	0.0986454	1	12.4734	Rcc1	1.80049	8.07662	12.8096	2.7363	3.78772	2.17774	1.354	0.840425	1.09235
	circ_06205	3									rno-miR-3065-3p	4.34291	0.051532	8.97129	1.73556	0.668518	1	0.0986454	1	12.4734	Rcc1	1.80049	8.07662	12.8096	2.7363	3.78772	2.17774	1.354	0.840425	1.09235
	circ_06207						3				rno-miR-3065-3p	4.34291	0.051532	8.97129	1.73556	0.668518	1	0.0986454	1	12.4734	Rcc1	1.80049	8.07662	12.8096	2.7363	3.78772	2.17774	1.354	0.840425	1.09235
	circ_11274									0.1	rno-miR-3065-3p	4.34291	0.051532	8.97129	1.73556	0.668518	1	0.0986454	1	12.4734	Rcc1	1.80049	8.07662	12.8096	2.7363	3.78772	2.17774	1.354	0.840425	1.09235
	circ_17669		3.29167								rno-miR-3065-3p	4.34291	0.051532	8.97129	1.73556	0.668518	1	0.0986454	1	12.4734	Rcc1	1.80049	8.07662	12.8096	2.7363	3.78772	2.17774	1.354	0.840425	1.09235
	circ_20423									0.1	rno-miR-3065-3p	4.34291	0.051532	8.97129	1.73556	0.668518	1	0.0986454	1	12.4734	Rcc1	1.80049	8.07662	12.8096	2.7363	3.78772	2.17774	1.354	0.840425	1.09235
	circ_03651									0.1	rno-miR-324-3p	1.30287	3.26099	3.39822	2.60334	4.01111	3.16786	2.6727	4.28193	6.57235	Mapk14	3.00888	1.4488	1.3111	0.474206	0.574516	0.456103	0.30646	0.312695	0.537931
	circ_03653	0.1	0.1			0.209913				0.1	rno-miR-324-3p	1.30287	3.26099	3.39822	2.60334	4.01111	3.16786	2.6727	4.28193	6.57235	Mapk14	3.00888	1.4488	1.3111	0.474206	0.574516	0.456103	0.30646	0.312695	0.537931
	circ_05865									0.1	rno-miR-324-3p	1.30287	3.26099	3.39822	2.60334	4.01111	3.16786	2.6727	4.28193	6.57235	Mapk14	3.00888	1.4488	1.3111	0.474206	0.574516	0.456103	0.30646	0.312695	0.537931
	circ_09251						0.1				rno-miR-324-3p	1.30287	3.26099	3.39822	2.60334	4.01111	3.16786	2.6727	4.28193	6.57235	Mapk14	3.00888	1.4488	1.3111	0.474206	0.574516	0.456103	0.30646	0.312695	0.537931
	circ_09661		0.1								rno-miR-324-3p	1.30287	3.26099	3.39822	2.60334	4.01111	3.16786	2.6727	4.28193	6.57235	Mapk14	3.00888	1.4488	1.3111	0.474206	0.574516	0.456103	0.30646	0.312695	0.537931
	circ_12899					0.1					rno-miR-324-3p	1.30287	3.26099	3.39822	2.60334	4.01111	3.16786	2.6727	4.28193	6.57235	Mapk14	3.00888	1.4488	1.3111	0.474206	0.574516	0.456103	0.30646	0.312695	0.537931
	circ_14195			3							rno-miR-324-3p	1.30287	3.26099	3.39822	2.60334	4.01111	3.16786	2.6727	4.28193	6.57235	Mapk14	3.00888	1.4488	1.3111	0.474206	0.574516	0.456103	0.30646	0.312695	0.537931
	circ_14199	0.1		0.1							rno-miR-324-3p	1.30287	3.26099	3.39822	2.60334	4.01111	3.16786	2.6727	4.28193	6.57235	Mapk14	3.00888	1.4488	1.3111	0.474206	0.574516	0.456103	0.30646	0.312695	0.537931
	circ_15466	3									rno-miR-324-3p	1.30287	3.26099	3.39822	2.60334	4.01111	3.16786	2.6727	4.28193	6.57235	Mapk14	3.00888	1.4488	1.3111	0.474206	0.574516	0.456103	0.30646	0.312695	0.537931
	circ_18387					0.1					rno-miR-324-3p	1.30287	3.26099	3.39822	2.60334	4.01111	3.16786	2.6727	4.28193	6.57235	Mapk14	3.00888	1.4488	1.3111	0.474206	0.574516	0.456103	0.30646	0.312695	0.537931
	circ_18388			3							rno-miR-324-3p	1.30287	3.26099	3.39822	2.60334	4.01111	3.16786	2.6727	4.28193	6.57235	Mapk14	3.00888	1.4488	1.3111	0.474206	0.574516	0.456103	0.30646	0.312695	0.537931
	circ_06205	3									rno-miR-338-3p	2.80188	1.74066	1.67261	4.14606	1.60444	1.00315	0.526315	1.27819	1.4893	Ptn	1.59553	1.29289	1.75775	0.527142	0.737854	0.582412	4.89056	1.559	1.62649
	circ_06206		3								rno-miR-338-3p	2.80188	1.74066	1.67261	4.14606	1.60444	1.00315	0.526315	1.27819	1.4893	Ptn	1.59553	1.29289	1.75775	0.527142	0.737854	0.582412	4.89056	1.559	1.62649
	circ_06207						3				rno-miR-338-3p	2.80188	1.74066	1.67261	4.14606	1.60444	1.00315	0.526315	1.27819	1.4893	Ptn	1.59553	1.29289	1.75775	0.527142	0.737854	0.582412	4.89056	1.559	1.62649
	circ_18622		3								rno-miR-338-3p	2.80188	1.74066	1.67261	4.14606	1.60444	1.00315	0.526315	1.27819	1.4893	Ptn	1.59553	1.29289	1.75775	0.527142	0.737854	0.582412	4.89056	1.559	1.62649
	circ_03651									0.1	rno-miR-3473	0.704255	1.04352	0.763514	1.68297	1.41807	3.16786	4.1402	1.64306	0.647523	Ccng2	0.362476	0.349413	0.258242	0.901644	0.569987	1.24637	1.30391	1.21475	0.889527
	circ_03653	0.1	0.1			0.209913				0.1	rno-miR-3473	0.704255	1.04352	0.763514	1.68297	1.41807	3.16786	4.1402	1.64306	0.647523	Ccng2	0.362476	0.349413	0.258242	0.901644	0.569987	1.24637	1.30391	1.21475	0.889527
	circ_04500							0.1			rno-miR-3473	0.704255	1.04352	0.763514	1.68297	1.41807	3.16786	4.1402	1.64306	0.647523	Ccng2	0.362476	0.349413	0.258242	0.901644	0.569987	1.24637	1.30391	1.21475	0.889527
	circ_09661		0.1								rno-miR-3473	0.704255	1.04352	0.763514	1.68297	1.41807	3.16786	4.1402	1.64306	0.647523	Ccng2	0.362476	0.349413	0.258242	0.901644	0.569987	1.24637	1.30391	1.21475	0.889527
	circ_13559								0.193159		rno-miR-3473	0.704255	1.04352	0.763514	1.68297	1.41807	3.16786	4.1402	1.64306	0.647523	Ccng2	0.362476	0.349413	0.258242	0.901644	0.569987	1.24637	1.30391	1.21475	0.889527
	circ_03651									0.1	rno-miR-3473	0.704255	1.04352	0.763514	1.68297	1.41807	3.16786	4.1402	1.64306	0.647523	Gng2	0.687136	1.2659	1.19223	1.05998	1.44951	0.928347	3.82266	1.92155	1.39789
	circ_03653	0.1	0.1			0.209913				0.1	rno-miR-3473	0.704255	1.04352	0.763514	1.68297	1.41807	3.16786	4.1402	1.64306	0.647523	Gng2	0.687136	1.2659	1.19223	1.05998	1.44951	0.928347	3.82266	1.92155	1.39789
	circ_04500							0.1			rno-miR-3473	0.704255	1.04352	0.763514	1.68297	1.41807	3.16786	4.1402	1.64306	0.647523	Gng2	0.687136	1.2659	1.19223	1.05998	1.44951	0.928347	3.82266	1.92155	1.39789
	circ_09661		0.1								rno-miR-3473	0.704255	1.04352	0.763514	1.68297	1.41807	3.16786	4.1402	1.64306	0.647523	Gng2	0.687136	1.2659	1.19223	1.05998	1.44951	0.928347	3.82266	1.92155	1.39789
	circ_13559								0.193159		rno-miR-3473	0.704255	1.04352	0.763514	1.68297	1.41807	3.16786	4.1402	1.64306	0.647523	Gng2	0.687136	1.2659	1.19223	1.05998	1.44951	0.928347	3.82266	1.92155	1.39789
	circ_03651									0.1	rno-miR-3473	0.704255	1.04352	0.763514	1.68297	1.41807	3.16786	4.1402	1.64306	0.647523	Osmr	1.18661	4.85392	3.79166	4.96648	3.89776	3.23004	6.12093	2.23499	1.55279
	circ_03653	0.1	0.1			0.209913				0.1	rno-miR-3473	0.704255	1.04352	0.763514	1.68297	1.41807	3.16786	4.1402	1.64306	0.647523	Osmr	1.18661	4.85392	3.79166	4.96648	3.89776	3.23004	6.12093	2.23499	1.55279
	circ_04500							0.1			rno-miR-3473	0.704255	1.04352	0.763514	1.68297	1.41807	3.16786	4.1402	1.64306	0.647523	Osmr	1.18661	4.85392	3.79166	4.96648	3.89776	3.23004	6.12093	2.23499	1.55279
	circ_09661		0.1								rno-miR-3473	0.704255	1.04352	0.763514	1.68297	1.41807	3.16786	4.1402	1.64306	0.647523	Osmr	1.18661	4.85392	3.79166	4.96648	3.89776	3.23004	6.12093	2.23499	1.55279
	circ_13559								0.193159		rno-miR-3473	0.704255	1.04352	0.763514	1.68297	1.41807	3.16786	4.1402	1.64306	0.647523	Osmr	1.18661	4.85392	3.79166	4.96648	3.89776	3.23004	6.12093	2.23499	1.55279
	circ_03651									0.1	rno-miR-3473	0.704255	1.04352	0.763514	1.68297	1.41807	3.16786	4.1402	1.64306	0.647523	Stmn1	0.979244	1.07344	0.924744	9.46524	10.0995	17.6333	7.03509	2.86654	0.931686
	circ_03653	0.1	0.1			0.209913				0.1	rno-miR-3473	0.704255	1.04352	0.763514	1.68297	1.41807	3.16786	4.1402	1.64306	0.647523	Stmn1	0.979244	1.07344	0.924744	9.46524	10.0995	17.6333	7.03509	2.86654	0.931686
	circ_04500							0.1			rno-miR-3473	0.704255	1.04352	0.763514	1.68297	1.41807	3.16786	4.1402	1.64306	0.647523	Stmn1	0.979244	1.07344	0.924744	9.46524	10.0995	17.6333	7.03509	2.86654	0.931686
	circ_09661		0.1								rno-miR-3473	0.704255	1.04352	0.763514	1.68297	1.41807	3.16786	4.1402	1.64306	0.647523	Stmn1	0.979244	1.07344	0.924744	9.46524	10.0995	17.6333	7.03509	2.86654	0.931686
	circ_13559								0.193159		rno-miR-3473	0.704255	1.04352	0.763514	1.68297	1.41807	3.16786	4.1402	1.64306	0.647523	Stmn1	0.979244	1.07344	0.924744	9.46524	10.0995	17.6333	7.03509	2.86654	0.931686
	circ_06807		3								rno-miR-3577	10.423	1	5.23325	13.0417	5.55859	1.58393	0.295936	1	1.25188	Msn	1.51319	1.56415	1.24248	1.76957	1.12239	1.00005	5.15601	1.48598	0.98249
	circ_10494						5.85139				rno-miR-3577	10.423	1	5.23325	13.0417	5.55859	1.58393	0.295936	1	1.25188	Msn	1.51319	1.56415	1.24248	1.76957	1.12239	1.00005	5.15601	1.48598	0.98249
	circ_19698	8.28	44.45				10				rno-miR-423-5p	0.45	0.25	0.970584	1.04105	1.26469	0.3	1.50278	1.21266	1.13171	Myc	7.44428	5.44141	1.46604	1.82521	2.93693	1.42668	2.10411	2.22807	2.84358
	circ_19698	8.28	44.45				10				rno-miR-423-5p	0.45	0.25	0.970584	1.04105	1.26469	0.3	1.50278	1.21266	1.13171	Pcna	0.956886	1.26332	0.948413	4.71489	3.79579	3.27666	2.64183	1.17075	1.0986
	circ_13559								0.193159		rno-miR-466b-5p	2.0846	6.52198	3.98724	1.73556	5.01389	4.75179	2.58458	5.35241	1.87782	E2f8	0.843071	1.04465	1.34681	5.41388	6.7789	4.847	2.08801	1.48868	1.28963
	circ_15359		3								rno-miR-466b-5p	2.0846	6.52198	3.98724	1.73556	5.01389	4.75179	2.58458	5.35241	1.87782	E2f8	0.843071	1.04465	1.34681	5.41388	6.7789	4.847	2.08801	1.48868	1.28963
	circ_20257					3					rno-miR-466b-5p	2.0846	6.52198	3.98724	1.73556	5.01389	4.75179	2.58458	5.35241	1.87782	E2f8	0.843071	1.04465	1.34681	5.41388	6.7789	4.847	2.08801	1.48868	1.28963
	circ_05865									0.1	rno-miR-497-5p	2.66473	2.68822	3.0637	3.66153	3.00225	1.77769	1.23655	2.94499	2.93315	Ccne1	0.930522	1.04209	1.3995	3.71579	6.38816	2.52881	1.32546	0.542775	0.640712
	circ_05871	0.1					3			0.1	rno-miR-497-5p	2.66473	2.68822	3.0637	3.66153	3.00225	1.77769	1.23655	2.94499	2.93315	Ccne1	0.930522	1.04209	1.3995	3.71579	6.38816	2.52881	1.32546	0.542775	0.640712
	circ_11311	3	5.14815		3				3	0.1	rno-miR-497-5p	2.66473	2.68822	3.0637	3.66153	3.00225	1.77769	1.23655	2.94499	2.93315	Ccne1	0.930522	1.04209	1.3995	3.71579	6.38816	2.52881	1.32546	0.542775	0.640712
	circ_11313					3					rno-miR-497-5p	2.66473	2.68822	3.0637	3.66153	3.00225	1.77769	1.23655	2.94499	2.93315	Ccne1	0.930522	1.04209	1.3995	3.71579	6.38816	2.52881	1.32546	0.542775	0.640712
	circ_09661		0.1								rno-miR-505-5p	0.419315	1.02979	0.865651	1.89334	1.6713	1.47079	0.913742	0.685108	0.804778	Gng2	0.687136	1.2659	1.19223	1.05998	1.44951	0.928347	3.82266	1.92155	1.39789
	circ_13710	0.0901857		0.1		0.1		0.1			rno-miR-6216	0.992665	0.43745	2.61663	0.661166	0.835648	0.452551	0.616776	0.369132	0.804778	Gmnn	0.825032	1.24648	3.63536	6.83518	5.01346	5.72854	3.38908	1.00211	1.27967
	circ_13711									0.1	rno-miR-6216	0.992665	0.43745	2.61663	0.661166	0.835648	0.452551	0.616776	0.369132	0.804778	Gmnn	0.825032	1.24648	3.63536	6.83518	5.01346	5.72854	3.38908	1.00211	1.27967
	circ_00363	0.1	0.1								rno-miR-6315	1.73716	0.326099	7.47608	0.053231	27.793	3.16786	1.64474	1.07048	0.938908	Kntc1	0.813046	0.697316	1.17659	6.93501	5.09601	4.98491	2.5894	1.16312	1.04098
	circ_02097	6.83908	4.93333				3				rno-miR-6315	1.73716	0.326099	7.47608	0.053231	27.793	3.16786	1.64474	1.07048	0.938908	Kntc1	0.813046	0.697316	1.17659	6.93501	5.09601	4.98491	2.5894	1.16312	1.04098
	circ_04231	0.195402	0.1								rno-miR-6315	1.73716	0.326099	7.47608	0.053231	27.793	3.16786	1.64474	1.07048	0.938908	Kntc1	0.813046	0.697316	1.17659	6.93501	5.09601	4.98491	2.5894	1.16312	1.04098
	circ_04467	0.1									rno-miR-6315	1.73716	0.326099	7.47608	0.053231	27.793	3.16786	1.64474	1.07048	0.938908	Kntc1	0.813046	0.697316	1.17659	6.93501	5.09601	4.98491	2.5894	1.16312	1.04098
	circ_04500							0.1			rno-miR-6315	1.73716	0.326099	7.47608	0.053231	27.793	3.16786	1.64474	1.07048	0.938908	Kntc1	0.813046	0.697316	1.17659	6.93501	5.09601	4.98491	2.5894	1.16312	1.04098
	circ_06103	0.29992									rno-miR-6315	1.73716	0.326099	7.47608	0.053231	27.793	3.16786	1.64474	1.07048	0.938908	Kntc1	0.813046	0.697316	1.17659	6.93501	5.09601	4.98491	2.5894	1.16312	1.04098
	circ_09136					0.1					rno-miR-6315	1.73716	0.326099	7.47608	0.053231	27.793	3.16786	1.64474	1.07048	0.938908	Kntc1	0.813046	0.697316	1.17659	6.93501	5.09601	4.98491	2.5894	1.16312	1.04098
	circ_15359		3								rno-miR-6315	1.73716	0.326099	7.47608	0.053231	27.793	3.16786	1.64474	1.07048	0.938908	Kntc1	0.813046	0.697316	1.17659	6.93501	5.09601	4.98491	2.5894	1.16312	1.04098
	circ_18044	0.1									rno-miR-6315	1.73716	0.326099	7.47608	0.053231	27.793	3.16786	1.64474	1.07048	0.938908	Kntc1	0.813046	0.697316	1.17659	6.93501	5.09601	4.98491	2.5894	1.16312	1.04098
	circ_18045									0.0995614	rno-miR-6315	1.73716	0.326099	7.47608	0.053231	27.793	3.16786	1.64474	1.07048	0.938908	Kntc1	0.813046	0.697316	1.17659	6.93501	5.09601	4.98491	2.5894	1.16312	1.04098
	circ_00363	0.1	0.1								rno-miR-6315	1.73716	0.326099	7.47608	0.053231	27.793	3.16786	1.64474	1.07048	0.938908	Ubd	1.32238	1.15181	0.193878	0.235027	0.352924	0.58086	3.17995	0.303153	1.54232
	circ_02097	6.83908	4.93333				3				rno-miR-6315	1.73716	0.326099	7.47608	0.053231	27.793	3.16786	1.64474	1.07048	0.938908	Ubd	1.32238	1.15181	0.193878	0.235027	0.352924	0.58086	3.17995	0.303153	1.54232
	circ_04231	0.195402	0.1								rno-miR-6315	1.73716	0.326099	7.47608	0.053231	27.793	3.16786	1.64474	1.07048	0.938908	Ubd	1.32238	1.15181	0.193878	0.235027	0.352924	0.58086	3.17995	0.303153	1.54232
	circ_04467	0.1									rno-miR-6315	1.73716	0.326099	7.47608	0.053231	27.793	3.16786	1.64474	1.07048	0.938908	Ubd	1.32238	1.15181	0.193878	0.235027	0.352924	0.58086	3.17995	0.303153	1.54232
	circ_04500							0.1			rno-miR-6315	1.73716	0.326099	7.47608	0.053231	27.793	3.16786	1.64474	1.07048	0.938908	Ubd	1.32238	1.15181	0.193878	0.235027	0.352924	0.58086	3.17995	0.303153	1.54232
	circ_06103	0.29992									rno-miR-6315	1.73716	0.326099	7.47608	0.053231	27.793	3.16786	1.64474	1.07048	0.938908	Ubd	1.32238	1.15181	0.193878	0.235027	0.352924	0.58086	3.17995	0.303153	1.54232
	circ_09136					0.1					rno-miR-6315	1.73716	0.326099	7.47608	0.053231	27.793	3.16786	1.64474	1.07048	0.938908	Ubd	1.32238	1.15181	0.193878	0.235027	0.352924	0.58086	3.17995	0.303153	1.54232
	circ_15359		3								rno-miR-6315	1.73716	0.326099	7.47608	0.053231	27.793	3.16786	1.64474	1.07048	0.938908	Ubd	1.32238	1.15181	0.193878	0.235027	0.352924	0.58086	3.17995	0.303153	1.54232
	circ_18044	0.1									rno-miR-6315	1.73716	0.326099	7.47608	0.053231	27.793	3.16786	1.64474	1.07048	0.938908	Ubd	1.32238	1.15181	0.193878	0.235027	0.352924	0.58086	3.17995	0.303153	1.54232
	circ_18045									0.0995614	rno-miR-6315	1.73716	0.326099	7.47608	0.053231	27.793	3.16786	1.64474	1.07048	0.938908	Ubd	1.32238	1.15181	0.193878	0.235027	0.352924	0.58086	3.17995	0.303153	1.54232
	circ_04500							0.1			rno-miR-6319	2.31622	0.12883	0.99681	1.73556	0.835648	0.0967781	16.6732	2.49779	43.6568	Ubd	1.32238	1.15181	0.193878	0.235027	0.352924	0.58086	3.17995	0.303153	1.54232
	circ_10839	3			0.1						rno-miR-664-2-5p	0.631696	0.543498	0.897129	2.7769	0.668518	1.34025	1.97368	1.23951	3.21911	Rac2	1.54319	2.86297	1.94553	1.0575	1.5393	0.952938	3.71993	1.5311	2.05113
	circ_14195			3							rno-miR-671	1.73716	2.82031	1.38992	1.3723	1.33704	2.50215	3.79203	1.80563	1.44643	Tes	1.93561	2.52241	6.11853	1.78472	5.55112	1.98717	5.82331	2.39729	5.163
	circ_14199	0.1		0.1							rno-miR-671	1.73716	2.82031	1.38992	1.3723	1.33704	2.50215	3.79203	1.80563	1.44643	Tes	1.93561	2.52241	6.11853	1.78472	5.55112	1.98717	5.82331	2.39729	5.163
	circ_00366	0.329239	0.1	0.1				0.1			rno-miR-93-3p	0.922868	2.13218	1.07655	3.84303	1.92452	2.1119	2.34962	3.94388	2.66024	Kntc1	0.813046	0.697316	1.17659	6.93501	5.09601	4.98491	2.5894	1.16312	1.04098
	circ_11274									0.1	rno-miR-93-3p	0.922868	2.13218	1.07655	3.84303	1.92452	2.1119	2.34962	3.94388	2.66024	Kntc1	0.813046	0.697316	1.17659	6.93501	5.09601	4.98491	2.5894	1.16312	1.04098
	circ_11301									3	rno-miR-93-3p	0.922868	2.13218	1.07655	3.84303	1.92452	2.1119	2.34962	3.94388	2.66024	Kntc1	0.813046	0.697316	1.17659	6.93501	5.09601	4.98491	2.5894	1.16312	1.04098
	circ_13559								0.193159		rno-miR-93-3p	0.922868	2.13218	1.07655	3.84303	1.92452	2.1119	2.34962	3.94388	2.66024	Kntc1	0.813046	0.697316	1.17659	6.93501	5.09601	4.98491	2.5894	1.16312	1.04098
	circ_13976					0.1					rno-miR-93-3p	0.922868	2.13218	1.07655	3.84303	1.92452	2.1119	2.34962	3.94388	2.66024	Kntc1	0.813046	0.697316	1.17659	6.93501	5.09601	4.98491	2.5894	1.16312	1.04098
	circ_13983		0.333333					0.1		0.195264	rno-miR-93-3p	0.922868	2.13218	1.07655	3.84303	1.92452	2.1119	2.34962	3.94388	2.66024	Kntc1	0.813046	0.697316	1.17659	6.93501	5.09601	4.98491	2.5894	1.16312	1.04098
	For circRNA high throughput data, the infinitesimal is represented by 0.1, and the blank represent undetectable expression level at indicated time points. Red and green colors represent the up-regulated and down-regulated expression, respectively.
